# Supplementary material
Source: PubMed Central journal article supplement (PMC8324503)
Supplement: NIHMS1660751-supplement-1.pdf [file NIHMS1660751-supplement-1.pdf]

## Supplemental Results

**Vocational Outcomes**

Overall, we observed 85.4% of the Pre-ETS+VIT-TAY group compared to 69.6% of the Pre-ETS only group obtained employment (competitive, non-competitive, or informal), an internship, or a volunteer position by 6-month follow-up ( $\chi^2=2.5, p=0.06$ ; OR=2.6, CI=0.94, 7.0,  $p=0.06$ ).

We evaluated vocational outcomes among autistic youth randomized to use VIT-TAY who self-identified as actively seeking employment within six months (i.e., job seekers) or beyond six months (or unknown) (i.e., non-job-seekers). Job-seekers who used VIT-TAY appeared to be more competitively employed than non-job-seekers who used VIT-TAY (33.3% vs. 16.7%;  $\chi^2=1.8, p=0.09$ ; OR=2.5, CI= 0.79, 7.88,  $p=0.09$ ), but this finding did not attain significance. Additionally, employment, internships, and volunteer work have all been identified as critical vocational outcomes among transition age autistic youth (Test et al., 2009). We observed that the rate of obtaining any vocational outcome (employment, internship, or volunteering) did not differ between Pre-ETS+VIT-TAY job-seekers (n=24, 87.5%) and Pre-ETS only job-seekers (n=16, 75.0%) ( $\chi^2=1.0, p=0.15$ ; OR=2.33, CI=0.58, 9.37;  $p=0.16$ ). Meanwhile, non-job-seekers from the Pre-ETS+VIT-TAY group (n=23) appeared more likely than non-job-seekers from the Pre-ETS only group (n=7) to obtain a vocational outcome (83.3% vs. 57.1%;  $\chi^2=2.13, p=0.08$ ; OR=3.8, CI= 0.80, 17.60,  $p=0.08$ ), but this finding did not attain significance.

Test, D. W., Mazzotti, V. L., Mustian, A. L., Fowler, C. H., Kortering, L., Kohler, P. (2009). Evidence-based secondary transition predictors for improving postschool outcomes for students with disabilities. *Career Development for Exceptional Individuals*, 32(3), 160-181. <https://doi:10.1177/0885728809346960>



| Supplemental Table 1. Vocational Outcomes at Six Month Follow-up |                           |                               |                                   |         |
|------------------------------------------------------------------|---------------------------|-------------------------------|-----------------------------------|---------|
|                                                                  | Pre-ETS<br>only<br>(n=23) | Pre-ETS<br>+VIT-TAY<br>(n=48) | Test<br>Statistic<br>( $\chi^2$ ) | P-Value |
| Employment Outcomes                                              |                           |                               |                                   |         |
| Employment (competitive)                                         | 0.0%                      | 25.0%                         | 6.9                               | 0.005   |
| Employment (non-competitive)                                     | 30.4%                     | 16.7%                         | 1.8                               | 0.09    |
| Employment (competitive or non-competitive)                      | 30.4%                     | 41.7%                         | 0.8                               | 0.18    |
| Employment (informal)                                            | 21.7%                     | 18.8%                         | 0.1                               | 0.77    |
| Internship (Paid or Unpaid)                                      | 30.4%                     | 14.6%                         | 2.5                               | 0.06    |
| Volunteer Position                                               | 34.8%                     | 54.2%                         | 2.3                               | 0.06    |
| Any Vocational Outcome                                           | 69.6%                     | 85.4%                         | 2.5                               | 0.06    |

| Supplemental Table 2. Spearman Correlations Between VIT-TAY Acceptability, Adherence, Performance, and Effectiveness Outcomes |                                   |                            |                                         |                                                                |
|-------------------------------------------------------------------------------------------------------------------------------|-----------------------------------|----------------------------|-----------------------------------------|----------------------------------------------------------------|
| Effectiveness Outcomes (at post-test)                                                                                         | VIT-TAY Acceptability Total Score | VIT-TAY Adherence          |                                         | VIT-TAY Performance (mean score across all virtual interviews) |
|                                                                                                                               |                                   | Total Completed Interviews | Total Minutes During Virtual Interviews |                                                                |
| Likeliness to be hired (global rating)                                                                                        | 0.24                              | -0.03                      | -0.16                                   | 0.36*                                                          |
| Job interview skill total score                                                                                               | 0.34*                             | -0.16                      | -0.20                                   | 0.39**                                                         |
| Are you someone they want to work with?                                                                                       | 0.38**                            | -0.10                      | -0.12                                   | 0.41**                                                         |
| Confidence                                                                                                                    | 0.38**                            | -0.16                      | -0.16                                   | 0.28+                                                          |
| Positivity                                                                                                                    | 0.15                              | 0.11                       | 0.05                                    | 0.26+                                                          |
| Professionalism                                                                                                               | 0.38**                            | -0.12                      | -0.15                                   | 0.25+                                                          |
| Interested in position                                                                                                        | 0.27+                             | -0.25                      | -0.18                                   | 0.46***                                                        |
| Will you do a good job?                                                                                                       | 0.26+                             | -0.12                      | -0.13                                   | 0.39**                                                         |
| Honesty                                                                                                                       | 0.02                              | -0.22                      | -0.04                                   | 0.45**                                                         |
| Dependability                                                                                                                 | 0.29*                             | -0.05                      | -0.22                                   | 0.27+                                                          |
| Working well with others                                                                                                      | 0.39*                             | -0.02                      | -0.04                                   | 0.12                                                           |
| Will you be a good worker?                                                                                                    | 0.23                              | -0.18                      | -0.25                                   | 0.18                                                           |
| Sharing strengths and skills                                                                                                  | 0.34*                             | -0.17                      | -0.22                                   | 0.04                                                           |
| Sharing past experiences                                                                                                      | 0.18                              | -0.12                      | -0.25+                                  | 0.21                                                           |
| Sharing limitations                                                                                                           | 0.08                              | -0.06                      | -0.10                                   | 0.10                                                           |
| Overall rapport                                                                                                               | 0.30*                             | -0.17                      | -0.24                                   | 0.24                                                           |
| Job interview self-efficacy                                                                                                   | 0.84***                           | 0.12                       | 0.17                                    | -0.12                                                          |
| Job interview anxiety                                                                                                         | -0.23                             | -0.12                      | -0.05                                   | 0.23                                                           |
| Competitive employment by six month follow-up                                                                                 | 0.09                              | -0.16                      | -0.31*                                  | 0.06                                                           |
| Number of weeks search for a job by six month follow-up                                                                       | 0.14                              | 0.10                       | 0.06                                    | -0.03                                                          |
| Interviewed for a job by six month follow-up                                                                                  | 0.02                              | -0.12                      | -0.22                                   | 0.02                                                           |

\*\*\*p<0.001; \*\*p<0.01; \*p<0.05; +p<0.10.

Supplemental Table 3. Spearman Correlations Between VIT-TAY Acceptability, Adherence, Performance, and Demographic, Clinical, Cognitive, and Behavioral Sample Characteristics

| Demographic, Clinical, Cognitive, and Behavioral Variables | VIT-TAY Acceptability Total Score | VIT-TAY Adherence          |                                         | VIT-TAY Performance (mean score across all virtual interviews) |
|------------------------------------------------------------|-----------------------------------|----------------------------|-----------------------------------------|----------------------------------------------------------------|
|                                                            |                                   | Total Completed Interviews | Total Minutes During Virtual Interviews |                                                                |
| Age                                                        | 0.05                              | 0.03                       | 0.26+                                   | -0.24                                                          |
| Biological sex (1=male, 0=female)                          | 0.08                              | -0.19                      | -0.25+                                  | 0.18                                                           |
| Race (1=white, 0=other)                                    | -0.06                             | 0.09                       | -0.09                                   | -0.22                                                          |
| Parental education                                         | 0.17                              | -0.18                      | -0.16                                   | -0.001                                                         |
| Autistic social challenges                                 | -0.23                             | 0.18                       | 0.16                                    | -0.12                                                          |
| Internalizing behavior                                     | -0.09                             | -0.10                      | -0.16                                   | 0.27+                                                          |
| Externalizing behavior                                     | 0.08                              | -0.14                      | -0.31*                                  | 0.14                                                           |
| Fluid cognition                                            | -0.09                             | -0.11                      | -0.23                                   | 0.47***                                                        |
| Crystallized cognition                                     | -0.12                             | -0.12                      | -0.10                                   | 0.66***                                                        |
| Depressive symptoms                                        | -0.03                             | -0.12                      | -0.12                                   | 0.15                                                           |

\*\*\*p<0.001; \*\*p<0.01; \*p<0.05; +p<0.10.

| Supplemental Table 4. Spearman Correlations Between Demographic, Clinical, Cognitive, and Behavioral Variables, and Effectiveness Outcomes (VIT-TAY group) |       |                |       |                    |                   |                        |                        |                 |                        |                     |
|------------------------------------------------------------------------------------------------------------------------------------------------------------|-------|----------------|-------|--------------------|-------------------|------------------------|------------------------|-----------------|------------------------|---------------------|
| Effectiveness Outcomes (at post-test)                                                                                                                      | Age   | Biological Sex | Race  | Parental Education | Social Challenges | Internalizing Behavior | Externalizing Behavior | Fluid Cognition | Crystallized Cognition | Depressive Symptoms |
| Likeliness to be Hired (Global Rating)                                                                                                                     | -0.19 | 0.11           | -0.04 | 0.36+              | -0.34*            | -0.06                  | 0.17                   | 0.23            | 0.52***                | -0.05               |
| Job Interview Skill Total Score                                                                                                                            | -0.18 | 0.07           | -0.16 | 0.21               | -0.39**           | 0.03                   | 0.14                   | 0.04            | 0.37**                 | 0.09                |
| Are you someone they want to work with?                                                                                                                    | -0.09 | 0.04           | -0.19 | 0.16               | -0.34*            | 0.001                  | 0.03                   | -0.04           | 0.24+                  | 0.04                |
| Confidence                                                                                                                                                 | -0.06 | 0.20           | -0.18 | 0.33+              | -0.21             | 0.01                   | 0.19                   | 0.003           | 0.15                   | 0.15                |
| Positivity                                                                                                                                                 | 0.13  | -0.15          | -0.08 | -0.10              | -0.14             | -0.03                  | -0.12                  | -0.15           | 0.14                   | 0.09                |
| Professionalism                                                                                                                                            | -0.15 | 0.11           | -0.05 | 0.05               | -0.35*            | 0.03                   | 0.06                   | -0.12           | 0.20                   | -0.11               |
| Interested in position                                                                                                                                     | -0.17 | -0.03          | -0.18 | 0.18               | -0.29*            | 0.03                   | 0.004                  | 0.12            | 0.28+                  | 0.14                |
| Will you do a good job?                                                                                                                                    | -0.16 | 0.01           | -0.19 | 0.15               | -0.38**           | 0.02                   | 0.15                   | 0.11            | 0.48***                | -0.05               |
| Honesty                                                                                                                                                    | -0.18 | 0.04           | -0.15 | 0.09               | -0.18             | 0.20                   | 0.32*                  | 0.19            | 0.53***                | -0.08               |
| Dependability                                                                                                                                              | -0.16 | 0.05           | -0.12 | 0.11               | -0.43**           | -0.15                  | 0.04                   | 0.10            | 0.39**                 | -0.07               |
| Working well with others                                                                                                                                   | 0.04  | -0.08          | -0.14 | 0.17               | -0.29*            | -0.05                  | -0.01                  | -0.06           | 0.17                   | 0.08                |
| Will you be a good worker?                                                                                                                                 | -0.22 | -0.002         | -0.07 | -0.04              | -0.29*            | 0.15                   | 0.28+                  | -0.08           | 0.25+                  | 0.19                |
| Sharing strengths and skills                                                                                                                               | -0.13 | 0.12           | -0.11 | 0.01               | -0.25+            | 0.15                   | 0.31*                  | -0.25+          | 0.03                   | 0.02                |
| Sharing past experiences                                                                                                                                   | -0.12 | -0.02          | 0.08  | -0.09              | -0.23             | 0.13                   | 0.18                   | 0.01            | 0.28+                  | 0.33*               |
| Sharing limitations                                                                                                                                        | -0.23 | -0.06          | -0.07 | 0.06               | -0.29*            | 0.01                   | 0.14                   | 0.05            | 0.24                   | 0.06                |
| Overall Rapport                                                                                                                                            | -0.17 | 0.14           | -0.13 | 0.22               | -0.40**           | -0.10                  | 0.05                   | 0.19            | 0.28+                  | 0.18                |
| Job interview self-efficacy                                                                                                                                | 0.26+ | -0.21          | 0.01  | 0.06               | 0.00              | -0.18                  | -0.03                  | -0.12           | -0.24                  | -0.16               |
| Job interview anxiety                                                                                                                                      | 0.07  | 0.14           | 0.01  | 0.13               | -0.02             | 0.06                   | -0.19                  | -0.08           | 0.22                   | 0.42**              |
| Competitive employment by six month follow-up                                                                                                              | -0.14 | 0.08           | 0.03  | 0.36+              | -0.14             | 0.05                   | 0.14                   | -0.02           | 0.07                   | 0.02                |
| Number of weeks search for a job by six month follow-up                                                                                                    | 0.02  | -0.12          | -0.19 | 0.04               | -0.12             | -0.34*                 | -0.15                  | -0.03           | -0.07                  | 0.04                |
| Interviewed for a job by six month follow-up                                                                                                               | -0.12 | 0.23           | 0.08  | 0.34+              | -0.05             | -0.11                  | 0.11                   | -0.11           | -0.07                  | 0.08                |

\*\*\*p<0.001; \*\*p<0.01; \*p<0.05; +p<0.10.
